# Supplementary material for: Identification of a Novel Angiogenesis Signalling circSCRG1/miR-1268b/NR4A1 Pathway in Atherosclerosis and the Regulatory Effects of TMP-PF In Vitro
Source: MDPI journal article supplement (doi:10.3390/molecules28031271), 2023-01-28
Supplement: s1 [file s1]

**Supplementary Table S1:** Sequences of si-circSCRG1, circSCRG1-wt, circSCRG1-mut, the miR-1268b inhibitor and the miR-1268b mimic

| Product name                   | Sequence                                                                                                                                                                                                                                                                                                                                                                                                                                                                                                                 |
|--------------------------------|--------------------------------------------------------------------------------------------------------------------------------------------------------------------------------------------------------------------------------------------------------------------------------------------------------------------------------------------------------------------------------------------------------------------------------------------------------------------------------------------------------------------------|
| si-circSCRG1                   | GCATCTGGATCAGTACCTA                                                                                                                                                                                                                                                                                                                                                                                                                                                                                                      |
| circSCRG1(miR-1268b)-wt        | TATATACACTTTTTTTTTTGGGGGGACGGAGTCTCACTCTGTGCGCCAGGCTGGAGTGC<br>AGTGGCACGATCTCAGCTCACTGCAAGCTCCACCTCCTGGGTTCACGCCATTCTCCTG<br>CCTCAGCCTCCCAAATAGCTGGGACTAGAGGCGCCTGCCACCACGCCAGCTAATTT<br>TTTTTTTTTTTTTTTTTGTATTTTGTAGTAGAGACGAGGTTTCACCGTATTAGCCAGGATG<br>GTCTTGATCTCCTGACCTCGTGATAAGCCCCGACATTTTTTATTCTAGGCAAGAGCCTA<br>TAGAGGTCTTATGTTGTCTAAAAGAATATATGGACTTCTTGGGCTAACCTAAGGCCTT<br>CCTTTCACTTTGTCTCCATGCCTATCATTTATTCTGTTCAGCTAGCCGGGCAGTCAAG<br>CCAGTCATCTCTTTAATCCTATGTATGTGTCTCTGCCTTGTTGTTCTTCTCACCCCTTC<br>CCTT |
| circSCRG1(miR-1268b)-mut       | TATATACACTTTTTTTTTTGGGGGGACGGAGTCTCACTCTGTGCGCCAGGCTGGAGTGC<br>AGTGGCACGATCTCAGCTCACTGCAAGCTCCACCTCCTGGGTGACATAAAATTCTCCT<br>GCCTCAGCCTCCCAAATAGCTGGGACTAGAGGCGAAGTAACAACATAAAAGCTAAT<br>TTTTTTTTTTTTTTTTTGTATTTTGTAGTAGAGACGAGGTTTCACCGTATTAGCCAGGA<br>TGGTCTTGATCTCCTGACCTCGTGATAAGCCCCGACATTTTTTATTCTAGGCAAGAGCC<br>TATAGAGGTCTTATGTTGTCTAAAAGAATATATGGACTTCTTGGGCTAACCTAAGGCC<br>TTCTTTCACTTTGTCTAACGTAAGATCATTTATTCTGTTCAGCTAGCCGGGCAGTCA<br>AGCCAGTCATCTCTTTAATCCTATGTATGTGTCTCTGCCTTGTTGTTCTTCTCACCCCT<br>TCCCTT  |
| miR-1268b inhibitor            | CACCCCCACCACCACGCCCCG                                                                                                                                                                                                                                                                                                                                                                                                                                                                                                    |
| miR-1268b mimic (sense strand) | UUUGUACUACACAAAAGUACUG                                                                                                                                                                                                                                                                                                                                                                                                                                                                                                   |

Notes: Abbreviation: si-circSCRG1, small interfering RNA (siRNA) of circular stimulator of chondrogenesis 1 (circSCRG1); circSCRG1-wt, circSCRG1-wild-type; circSCRG1-mut, circSCRG1-mutant-type.

**Supplementary Table S2:** Targets, primers sequence, annealing temperature, and product length used in RT-qPCR

| Gene                      | Bidirectional primer sequence                                      | Annealing temperature (°C) | Product length (bp) |
|---------------------------|--------------------------------------------------------------------|----------------------------|---------------------|
| circRNA_06206 (circSCRG1) | F:5' GCTGTTTCACAGACACAAGCATC3'<br>R:5' CTTTCATCGTAATTCGCAGAGACT3'  | 60                         | 86                  |
| hsa_circ_0004417          | F:5' TAGAACCACACAAGGAGAAGCC 3'<br>R:5' CTGTCAAACCATACATTGGAGATT 3' | 60                         | 94                  |
| hsa_circ_0041555          | F:5' TGCTAATGTTGATGCTGCGTGA 3'<br>R:5' GGAGGGGATAATCTTTTGGGAA 3'   | 60                         | 72                  |
| miR-1268b                 | GSP:5'GAAACGGGCGTGGTGG3'<br>R:5'GTGCGTGTCGTGGAGTCG3'               | 60                         | 62                  |
| miR-6826-3p               | GSP:5'GGCTCCCCTCTCTTTCCT3'<br>R:5'GTGCGTGTCGTGGAGTCG3'             | 60                         | 62                  |
| SCRG1                     | F:5' TCACAACTGTCACAACCTTCCG 3'<br>R:5' CATCTCACATCCCTTCCCATCC 3'   | 60                         | 97                  |
| NR4A1                     | F:5' GCAAGTGGGCGGAGAAGA 3'<br>R:5' CAGGGACATCGACAAGCAAG 3'         | 60                         | 252                 |
| EGLN1                     | F:5' GGCAATGGAACGGGTAT 3'<br>R:5' TTGGGTTCAATGTCAGCA 3'            | 60                         | 164                 |
| PLXND1                    | F:5' GGCCAAGTAAGCTGCGACAT 3'<br>R:5' GAAGTTCCCTACCTGGATTGTG 3'     | 60                         | 117                 |

|            |                                                                   |    |     |
|------------|-------------------------------------------------------------------|----|-----|
| SASH1      | F:5' GACGAAGAGCCGCCTTAC 3'<br>R:5' AACGTGCCGACTTTGTTG 3'          | 60 | 179 |
| RUNX1      | F:5' ATGGCACTCTGGTCACTG 3'<br>R:5' CTGCCGTAGCATTCTCA 3'           | 60 | 72  |
| Beta-actin | F:5' GTGGCCGAGGACTTTGATTG3'<br>R:5' CCTGTAACAACGCATCTCATATT3'     | 60 | 73  |
| U6         | F:5'GCTTCGGCAGCACATATACTAAAAT3'<br>R:5'CGCTTCACGAATTTGCGTGTGCAT3' | 60 | 89  |
| GAPDH      | F:5'GGGAAACTGTGGCGTGAT3'<br>R:5'GAGTGGGTGTCGCTGTTGA3'             | 60 | 299 |

Notes: cycling conditions were as follows: 95°C for 10 min, followed by 40 cycles of 95°C for 10 s and 60°C for 60 s. Abbreviation: circSCRG1, circular stimulator of chondrogenesis 1; SCR1, stimulator of chondrogenesis 1; NR4A1, nuclear receptor subfamily 4 group A member 1; EGLN1, egl and nine homologue 1; PLXND1, plexin D1; SASH1, SAM-and SH3-domain containing 1; RUNX1, runt-related transcription factor 1; GAPDH, glyceraldehyde-3-phosphate dehydrogenase.
